# Supplementary material
Source: PubMed Central journal article supplement (PMC9664837)
Supplement: mmc4.pdf [file mmc4.pdf]

**Table S1**

| VISITS | SEROLOGY |          |       |
|--------|----------|----------|-------|
|        | NEGATIVE | POSITIVE | %     |
| 1      | 321      | 266      | 45.32 |
| 2      | 101      | 301      | 74.88 |
| 3      | 66       | 379      | 85.17 |
| 4      | 28       | 515      | 94.84 |
